# Supplementary material for: Self-assembling protein nanoparticles and virus like particles correctly display β-barrel from meningococcal factor H-binding protein through genetic fusion
Source: PubMed Central journal article supplement (PMC9480994; doi:10.1371/journal.pone.0273322), 2022-09-16
Supplement: pone.0273322.s003.pdf [file pone.0273322.s003.pdf]

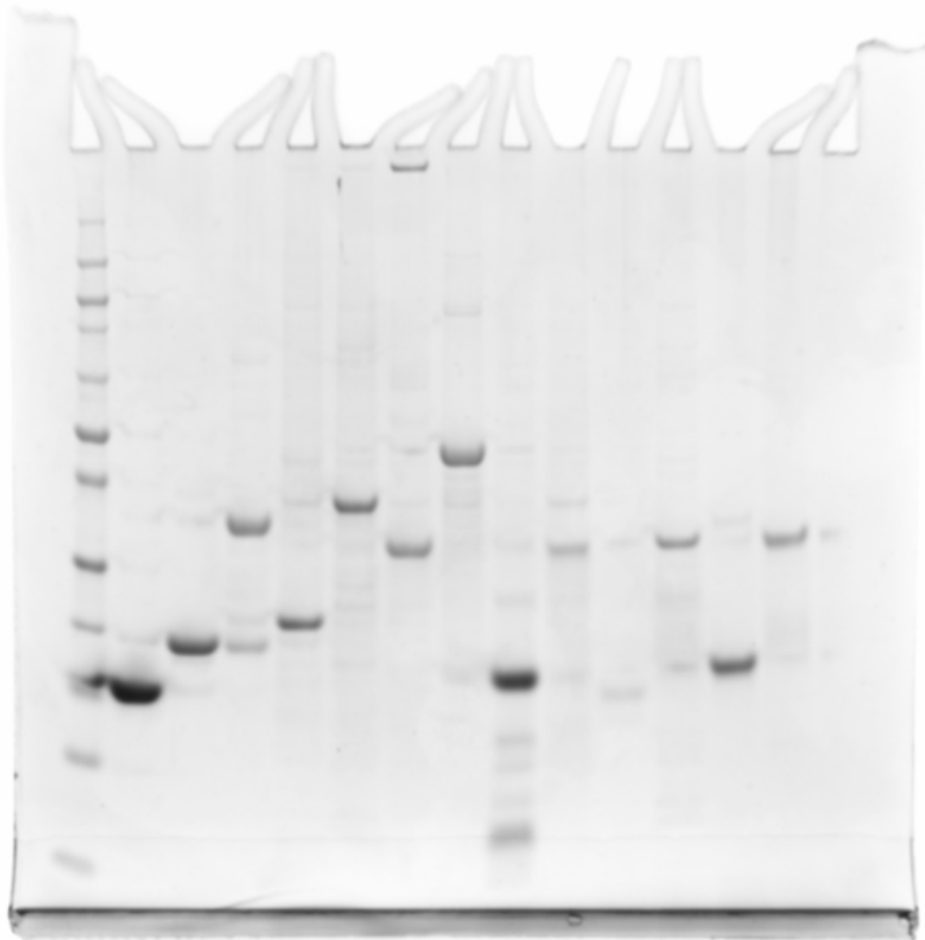

SDS-PAGE loading order: Marker,  $\beta$ Barrel, Ferritin,  $\beta$ Barrel\_Ferritin, mI3,  $\beta$ Barrel\_mI3, Encapsulin,  $\beta$ Barrel\_Encapsulin, AP205,  $\beta$ Barrel\_AP205, Qbeta,  $\beta$ Barrel\_Qbeta, HBcAg,  $\beta$ Barrel\_HBcAg. Acquired using ImageLab software from BioRad. From this image, figure 2 was generated.

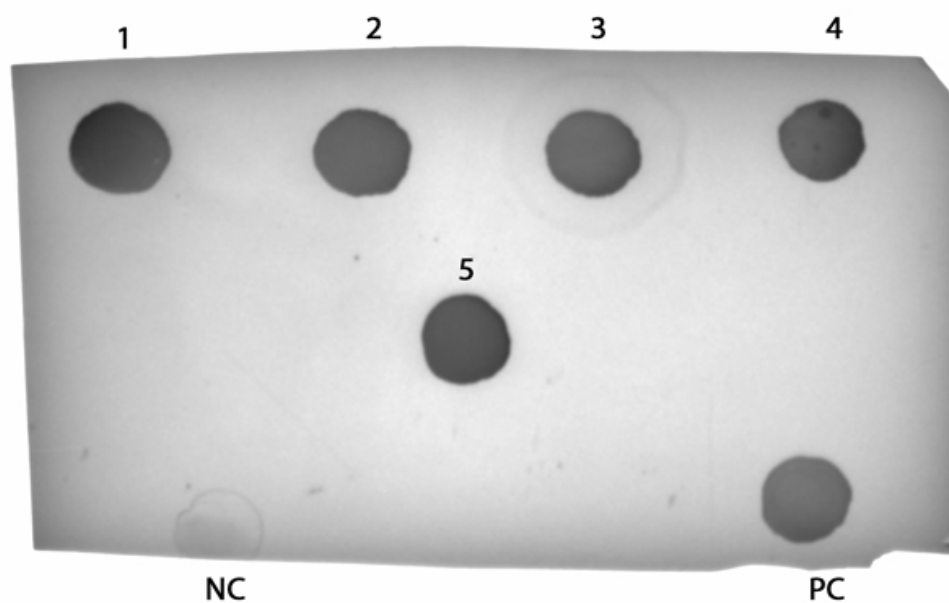

Dot Blot loading order of different (1)  $\beta$ barrel-ferritin, (2)  $\beta$ barrel-mI3, (3)  $\beta$ barrel-Encapsulin, (4)  $\beta$ barrel-AP205, (5)  $\beta$ barrel-HBcAg, (NC) Negative control represented by naked ferritin, (PC) Positive control represented by monomeric  $\beta$ barrel. Acquired using ImageLab from BioRad. From this image, figure 4 was generated
